# Supplementary material
Source: Springer Nature journal article supplement (https://www.springermedizin.de/resource/supplementary/12865_2014_581_MOESM9_ESM.pdf/9428282)

### Body weight

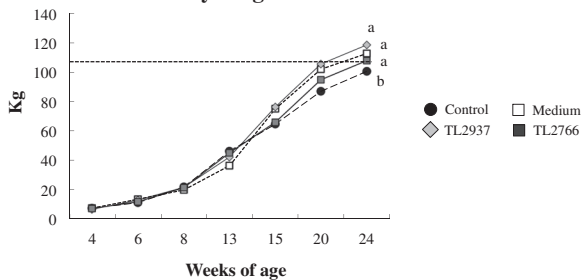

### Plasma CRP

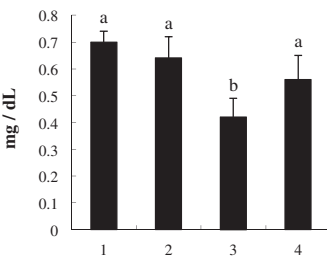

### Plasma ACA

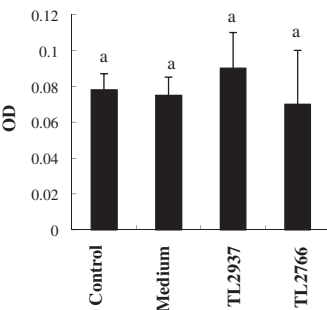

### Detection of ETEC in feces

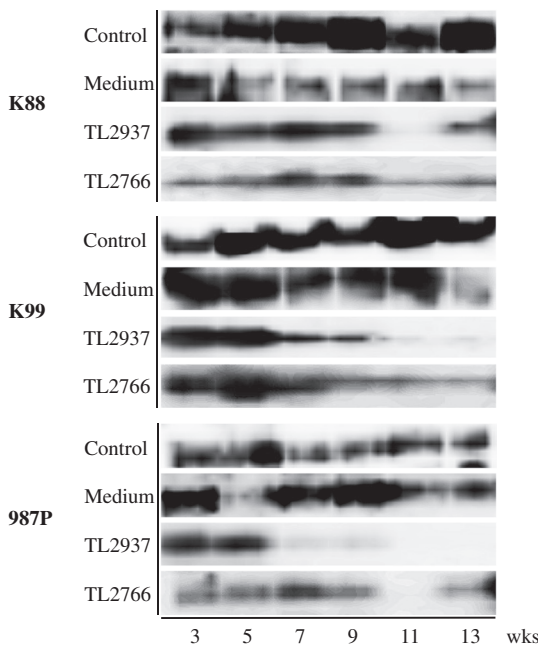

Supplement: MOESM9 [file 9428282]
